# Supplementary material
Source: PubMed Central journal article supplement (PMC3698950)
Supplement: NIHMS479648-supplement-01.pdf [file NIHMS479648-supplement-01.pdf]

# Inventory of Supplemental Information

## ***File 1 : Wu et al Supp. Text (Final)***

### **Supplemental Figure Legends**

#### **Supplemental Figures (6)**

- Figure S1 relates to Figure 1.
- Figure S2 relates to Table 1.
- Figure S3 relates to Figure 3.
- Figure S4 relates to Figure 4.
- Figure S5 relates to Figure 5.
- Figure S6 relates to a point in the Discussion.

#### **Supplemental Table (1)**

A complement to the Materials and Methods section.

#### **Supplemental Materials and Methods**

A complement to the Materials and Methods section.

## ***File 2 : Wu et al Seq***

-Sequence file. 3' RACE sequences on the Intermediate RNA species (relates to Figure 3 D).

## Supplemental Figure Legends

**Table S1** (relates to the Materials and Methods section). Primer sequences for northern analyses, qRT-PCR, translation and stability assays, and cloning.

**Fig. S1.** (Relates to Fig. 1) miR-35 quantification in *C. elegans* embryonic extracts and fractions. (A) miR-35 real-time (qRT)-PCR analysis. Total RNA was isolated from fractions of wild-type (N2) *C. elegans* embryonic extract not filtered (NF) or filtered fractions (1-5). A standard curve was made with different concentrations of miR-35 template primer (fM). miR-35 concentration per reaction was multiplied by the dilution factor to obtain miR-35 concentration per fraction (nM). Dilution factor: RNA concentration from the stock divided by 0.0025 (final concentration in qRT-PCR reaction). (B) miR-35 northern blot analysis. A standard curve was made with different amounts of miR-35 DNA primer (pg) to determine the concentration of miR-35 in the middle embryo (me) lysate from wild-type (N2). 5S rRNA was used as a loading control for RNA. (C) miR-35 concentration (nM) per fraction from the data obtained in (A) and (B). (D) Northern blot analysis of miR-35-42 family members on 2'-O-Me depletions. Extracts prepared from wild-type (N2) *C. elegans* embryos were incubated with either  $\alpha$ -miR-35 or  $\alpha$ -let-7 2'-O-Me to pull down miRISC, and unbound fractions were probed for miR-35, miR-37 and miR-41. 5S rRNA was used as a loading control.

**Fig. S2.** (Relates to Table 1) Characterization of miR-35-RISC pulldown from *C. elegans* embryos. Western blot analysis on affinity-purified miRISC to confirm results obtained by MudPIT analysis. N2 embryonic extracts were incubated with 2'-O-Me, as

indicated. Proteins were probed with polyclonal antibodies against ALG-1/2, DCR-1, AIN-1, RDE-4, and GFP. \* and \*\* indicate known non-specific bands. Bottom panel: western blot analysis of DCP-2 on affinity-purified miRISC. Wild-type embryonic extracts were incubated with either no 2'-O-Me (beads only),  $\alpha$ -miR-35, or  $\alpha$ -let-7 2'-O-Me. Proteins were probed with polyclonal antibodies against ALG-1/ALG-2 and DCP-2.

**Fig. S3.** (Relates to Fig. 3) (A) Time-course of RL 6xmiR-52 deadenylation in wild-type embryos. Full-length reporters contain a poly(A) tail of 87 nucleotides. Images are representative of three independent experiments. (B) Time-course of mRNA stability of RL 6xmiR-52 reporters lacking a poly(A) tail in the absence or presence of specific ( $\alpha$ -miR-52) or non-specific ( $\alpha$ -miR-1) 2'-O-Me. Images are representative of a triplicate experiment conducted in the same wild-type embryonic extract. Values represent the average from the triplicate experiment, and error bars indicate standard deviation. Quantification of the mRNA half-deadenylation time ( $t_{d1/2}$ ) and half-life ( $t_{1/2 \text{ decay}}$ ) was obtained using ImageJ.

**Fig. S4.** (Relates to Fig. 4) Translation of RL in *C. elegans* embryos prepared from *alg-2(ok304); alg-1 RNAi*. Luciferase activity from each fraction was measured following 3-hours translation incubation.

**Fig. S5.** (Relates to Fig. 5) (A) Northern blot analysis of candidate miRNAs affecting the 3'UTR of *egl-1* and *toh-1* mRNAs. RNA was prepared from wild-type (N2) or mid-

development embryo (me). Primers complementary to the probe (0.5 and 1.5 pg or 5 and 25 pg in the case of miR-60) were used as positive controls. (B) Time-course of RL *egl-1* 3'UTR and RL *toh-1* 3'UTR deadenylation in N2 embryo extract. Reporter mRNAs were incubated in the presence or absence of 50 nM of  $\alpha$ -miR-35,  $\alpha$ -miR-58,  $\alpha$ -miR-81,  $\alpha$ -miR-86 and  $\alpha$ -miR-87 or the negative control  $\alpha$ -miR-1. (C) Time-course of RL *egl-1* 3'UTR translation in N2 embryo extract. The reporter mRNA was incubated with 50 nM of 2'-O-Me, as indicated.  $\alpha$ -miR-1 served as a negative control. Values represent averages from a triplicate experiment conducted in the same extract, and error bars indicate standard deviation. (D) Time-course of RL reporter mRNAs deadenylation fused to various copies of miR-52 binding sites (1x-6x). (E) Time-course of RL 3xmiR-35 reporter mRNAs deadenylation. For all the 3xmiR-35 reporters, miR-35 binding sites were separated by five nucleotides, with the exception of RL 3xmiR-35 spaced, in which the miR-35 binding sites are separated by 50 nucleotides. The size of the linker (sequence between the miR-35 sites and the poly(A) tail) are as follows: 161 nts (RL 3xmiR-35 and RL 3xmiR-35 spaced), 261 nts (RL 3xmiR-35 LL), and 32 nts (RL 3xmiR-35 SL). Images in D and E are representative of three independent experiments. Values for time of half-deadenylation ( $t_{d1/2}$ ) were obtained by measuring the intensity of the bands using ImageJ.

**Fig. S6.** (Relates to a point in the Discussion section) qRT-PCR analysis of the expression levels of *egl-1* and *toh-1* mRNA. Total RNA from embryonic preparations was isolated from wild-type (N2) and *alg-2(ok304)*; *alg-1 RNAi*. *egl-1* and *toh-1* mRNA levels were normalized against actin mRNA. qRT-PCR results are presented as the

mean from triplicate independent preparations and error bars represent standard deviation.

**Table S1.** (Complement to the Materials and Methods section) Primer sequences for northern analyses, qRT-PCR, translation and stability assays, and cloning.

| Name                                | Sequence                                  |
|-------------------------------------|-------------------------------------------|
| <b>Starfire probes</b>              |                                           |
| α-miR-35                            | 5'-ACTGCTAGTTTCCACCCGGTGA/3StarFire/-3'   |
| α-miR-52                            | 5'-AGCACGGAAACATATGTACGGGTG/3StarFire/-3' |
| α-miR-58                            | 5'-ATTGCCGTAAGTGAACGATCTCA/3StarFire/-3'  |
| α-miR-60                            | 5' ACTAGAAAATGTGCATAATA/3StarFire/-3'     |
| α-miR-86                            | 5'-GACTGTGGCAAAGCATTCACTTA/3StarFire/-3'  |
| α-miR-87                            | 5'ACACCTGAACTTTGCTCAC/3StarFire/-3'       |
| α-miR-230                           | 5' TCTCCTGGTCGCACAATAA/3StarFire/-3'      |
| α-miR-232                           | 5' TCACCGCAGTTAAGATGCATTTA/3StarFire/-3'  |
| <b>qRT-PCR</b>                      |                                           |
| Universal primer                    | 5'-CATGATCAGCTGGGCCAAGA-3'                |
| miR-35 specific primer              | 5'-CATGATCAGCTGGGCCAAGAAGTCTGTT-3'        |
| miR-35 LNA                          | 5'-T+CACCGGGTGGAAAC-3'                    |
| <b>2'-O-Me oligos</b>               |                                           |
| α-miR-1                             | 5'-UCUUCUCCAUACUUCUUUACAUUCCAACCUU-3'     |
| α-miR-35                            | 5'-UUAAUACUGCUAGUUUCCACCCGGUGAUUAAU-3'    |
| α-miR-52                            | 5'-UUAAUAGCACGGAAACAUAUGUACGGGUGUUAAU-3'  |
| α-miR-58                            | 5'-UUAAUUGCCGUACUGAACGAUCUCAUAAU-3'       |
| α-miR-81                            | 5'-UUAAUACUGGCUUUCACGAUGAUCUCAUAAU-3'     |
| hsa-miR-16                          | 5'-UUAAUCGCCAAUAUUUACGUGCUGCUAUUAAU-3'    |
| α-miR-86                            | 5'-UUAAUGACUGUGGCAAAGCAUUCACUUAUAAU-3'    |
| α-miR-87                            | 5'-UUAAUACACCUGAAACUUUGCUCACUAAU-3'       |
| <b>miR-35 targets 3'UTR cloning</b> |                                           |
| c34h3.1 fwd                         | 5'-ATAAAGTAGTGCAATGCTTGATTCTACCACA-3'     |
| c34h3.1 rev                         | 5'-TATTGCGGCCGCTAATGGAATCTGTGAGCAACG-3'   |
| hlh-11 fwd                          | 5'-ACTAGTGCCTGACTTTTGACAAATGTAG-3'        |
| hlh-11 rev                          | 5'-GCGGCCGCATTGGTACTCTTGTCTCAGTGG-3'      |

nhl-2 fwd 5'-ATAAACTAGTGGAGGTTACCCCAATTCCTAT-3'

nhl-2 rev 5'-TATTGCGGCCGCGGGCGAGCTGAAATTCAAATT-3'

r05h11.2 fwd 5'-ATAAACTAGTATTGAATACTTATAGACCTCAAG-3'

r05h11.2 rev 5'-TATTGCGGCCGCTCTAACCGTCTGAATATTATCTG-3'

spn-4 fwd 5'-ATAAACTAGTTCAGTTCAACTGATACGCC-3'

spn-4 rev 5'-TATTGCGGCCGCTATGGCGAAGCACTTCATTTG-3'

toh-1 fwd 5'-ACTAGTATTCATTTTCTAGTTCTTCTACTC-3'

toh-1 rev 5'-GCGGCCGCAAGACTCAAATGTTTCATTGGG-3'

y71f9b.8 fwd 5'-ATAAACTAGTATTTTCAGGCTTTCAAGCCCA-3'

y71f9b.8 rev 5'-TATTGCGGCCGCTTTATAGTTAATAAATTTATTTGATTTA-3'

### **Cloning**

miR-52 1X fwd 5'-CTAGAGATTTTTCCAGCAGCGAAAATGTACGGGTGAATTCGC-3'

miR-52 1X rev 5'-GGCCGCGAATTCACCCGTACATTTTCCGTGCTGGGAAAAATCT-3'

miR-52 2X fwd 5' CTAGA A GCA CGG AAA ATG TAC GGG TG CTCGAG A GCA CGG AAA  
ATG TAC GGG TG GC-3'

miR-52 2X rev 5'-GGCCGC C ACC CGT ACA TTT TCC GTG CT CTCGAG C ACC CGT ACA  
TTT TCC GTG CT T-3'

miR-52 3X fwd 5'-CTAGA A GCA CGG AAA ATG TAC GGG TG CTCGAG A GCA CGG AAA  
ATG TAC GGG TG CTCGAG A GCA CGG AAA ATG TAC GGG TG GC-3'

miR-52 3X rev 5'-GGCCGC C ACC CGT ACA TTT TCC GTG CT CTCGAG C ACC CGT ACA  
TTT TCC GTG CT CTCGAG C ACC CGT ACA TTT TCC GTG CT T-3'

miR-52 4X fwd 5'-AATTC A GCA CGG AAA ATG TAC GGG TG CTCGAG A GCA CGG AAA  
ATG TAC GGG TG CTCGAG A GCA CGG AAA ATG TAC GGG TG G-3'

miR-52 4X rev 5'-AATTC C ACC CGT ACA TTT TCC GTG CT CTCGAG C ACC CGT ACA  
TTT TCC GTG CT CTCGAG C ACC CGT ACA TTT TCC GTG CT G-3'

miR-35 short linker fwd 5'-ATAAGCTGCAATAAACAAGTTG-3'

miR-35 short linker rev 5'-CTA AAG GGA AGC GGC CGC-3'

miR-35 long linker fwd 5'-GCGGCCGCTTCCCTTTAG-3'

miR-35 long linker rev 5'-GCGGCCGCAATAAAGCATTTTTTTTCACTGCA-3'

miR-35 1X fwd 5'-CTAGTACTGCTAGTTTCCACCCGGTGAGC-3'

miR-35 1X rev 5'-GCCCCGCTCACCAGGTGGAACTAGCAGTA-3'

miR-35 2X fwd 5'-CTAGAACTGCTAGCCACCCGGTGAG

miR-35 2X rev  
AATCACTGCTAGCCACCCGGTGAGC-3'  
5'-GGCCGCTCACCGGGTGGCTAGCAG  
TGAATTCTCACCGGGTGGCTAGCAGTT-3'

miR-35 3X fwd  
5'-CTAGA ACTGCTAGCCACCCGGTGATTAATACTGCTAGCCACCC  
GGTGATTAATACTGCTAGCCACCCGGTGAGC-3'

miR-35 3X rev  
5'-GGCCGCTCACCGGGTGGCTAGCAGTATTAATCACCGGGT  
GGCTAGCAGTATTAATCACCGGGTGGCTAGCAGTT-3'

miR-35 4X fwd  
5'-AATTGACTGCTAGCCACCCGGTGATTAATACTGCTAGCCA  
CCCGGTGATTAATACTGCTAGCCACCCGGTGATTAATG-3'

miR-35 4X rev  
5'-AATTCATTAATCACCGGGTGGCTAGCAGTATTAATCACC  
GGGTGGCTAGCAGTATTAATCACCGGGTGGCTAGCAGTC-3'

---



**A**

| Fractions | Ct mean      | Dilution Factor | miR-35 conc. [nM]  |
|-----------|--------------|-----------------|--------------------|
| NF        | 16.33 ± 0.23 | 1062            | <b>8.38 ± 1.16</b> |
| 1         | 16.78 ± 0.23 | 487.5           | <b>2.91 ± 0.40</b> |
| 2         | 16.22 ± 0.10 | 808.3           | <b>6.81 ± 0.43</b> |
| 3         | 16.26 ± 0.23 | 1006            | <b>8.31 ± 1.18</b> |
| 4         | 16.60 ± 0.09 | 819.2           | <b>5.41 ± 0.30</b> |
| 5         | 16.42 ± 0.33 | 429.0           | <b>3.23 ± 0.78</b> |

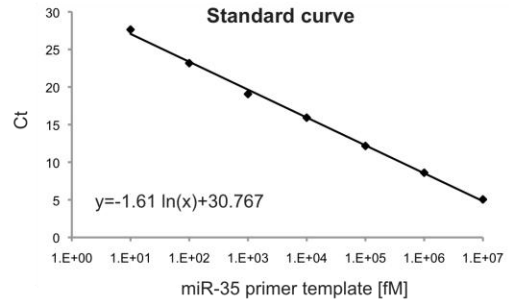

**B**

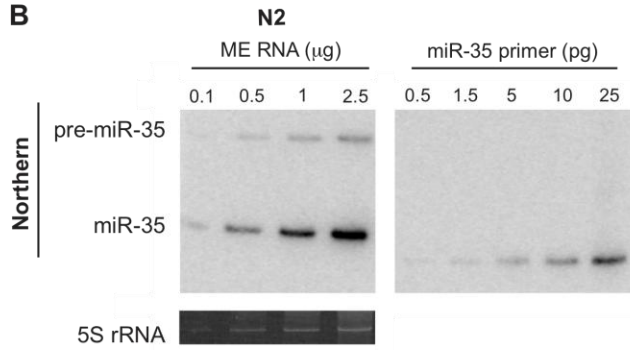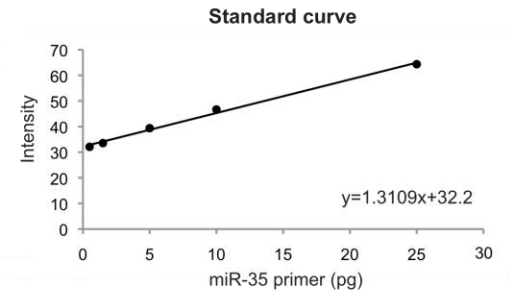

**C**

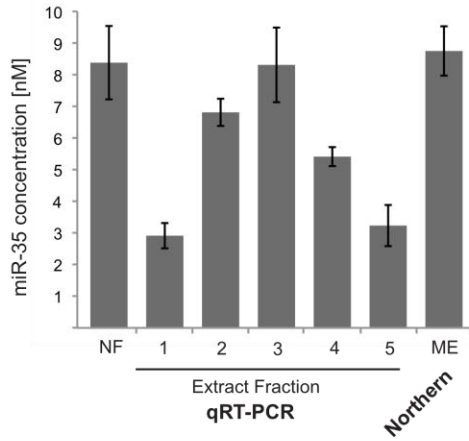

**D**

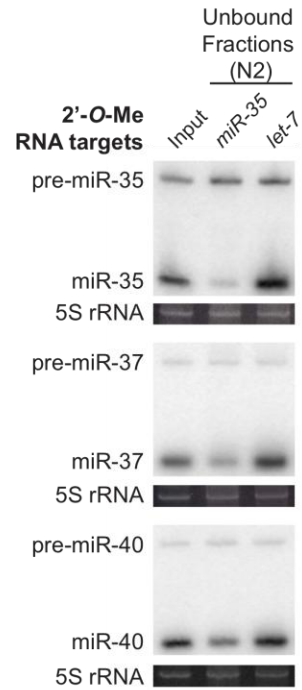

**Wu et al. Fig. S1**

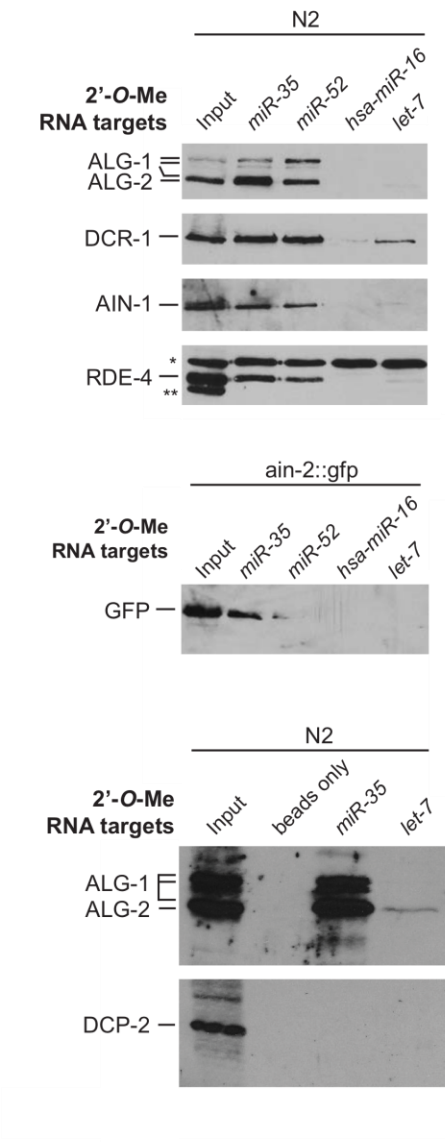

Wu et al. Fig. S2

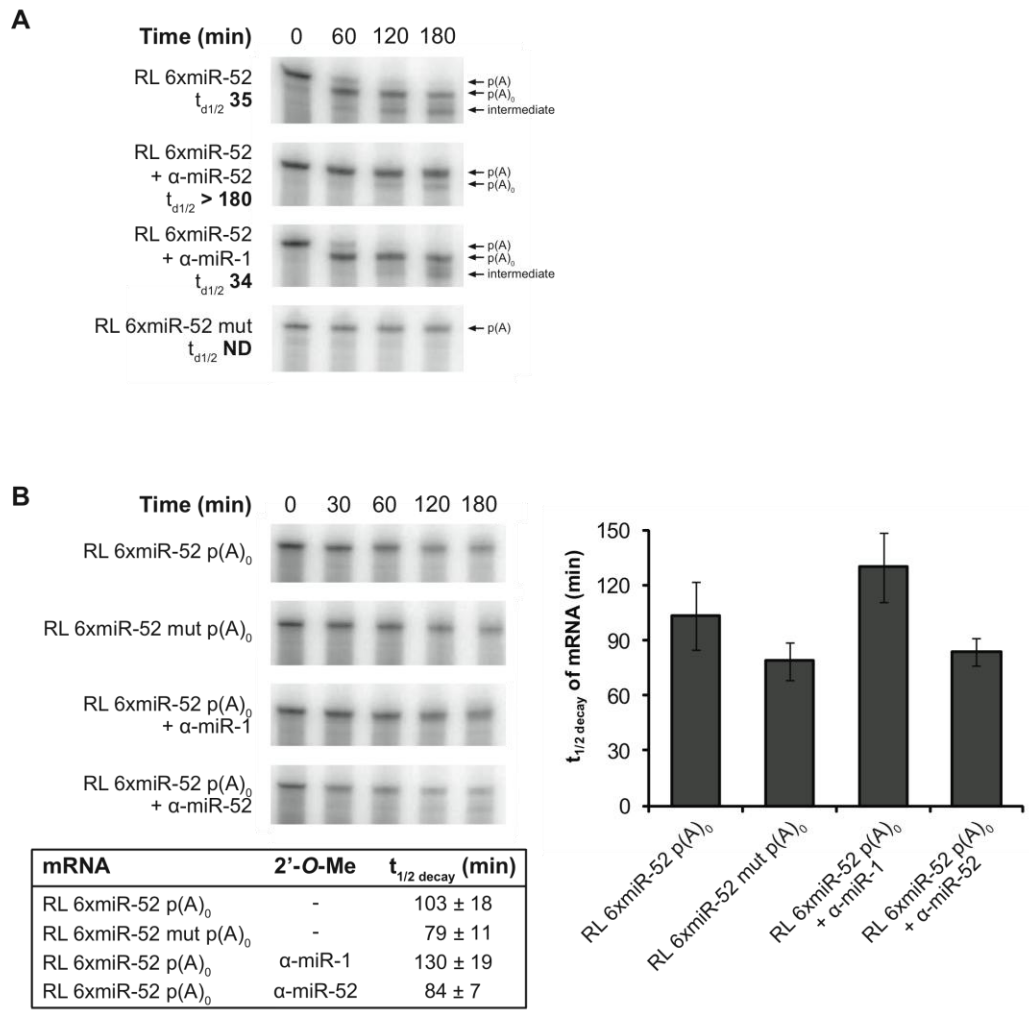

Wu et al. Fig. S3

Wu et al. Fig. S4

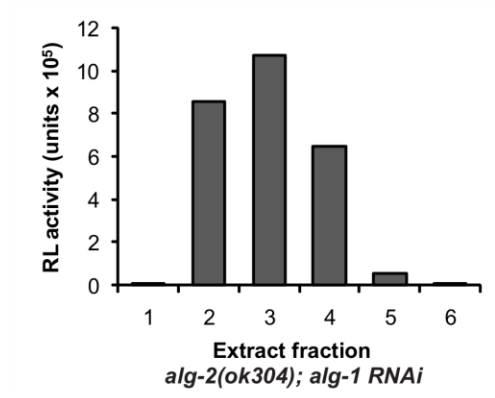

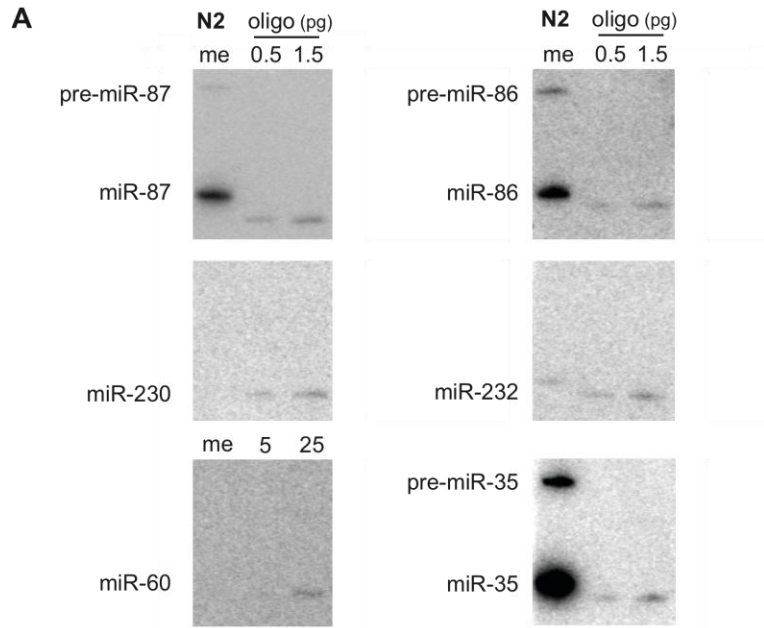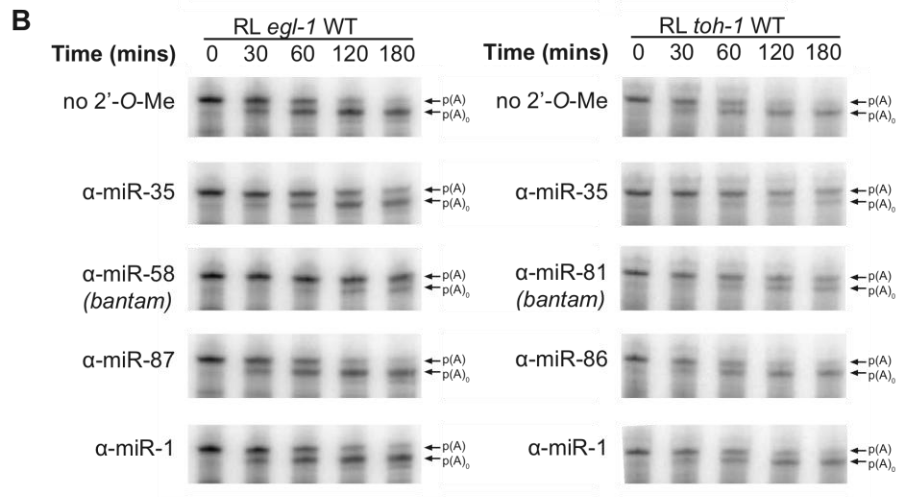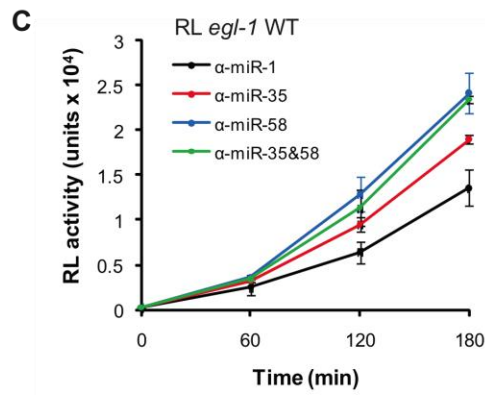

Wu et al Fig. S5

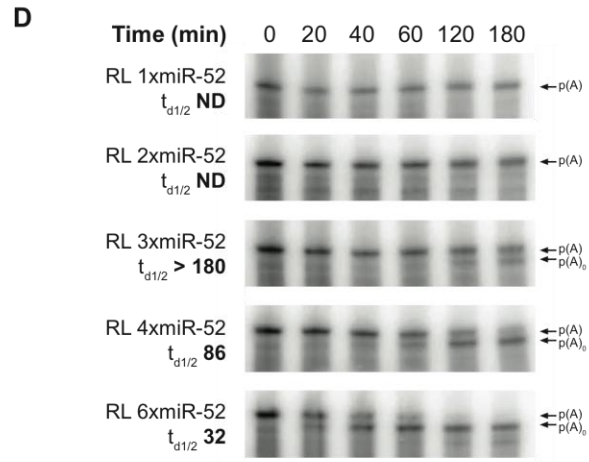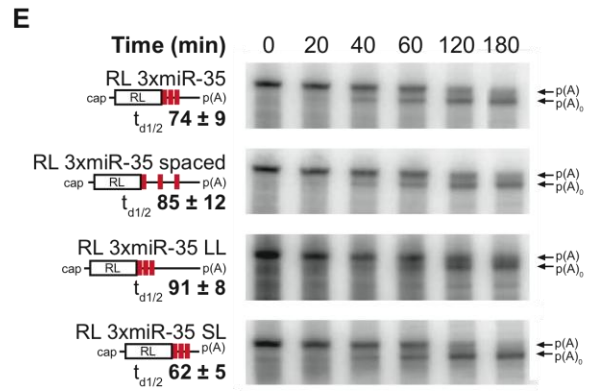

Wu et al Fig. S5

Wu et al. Fig. S6

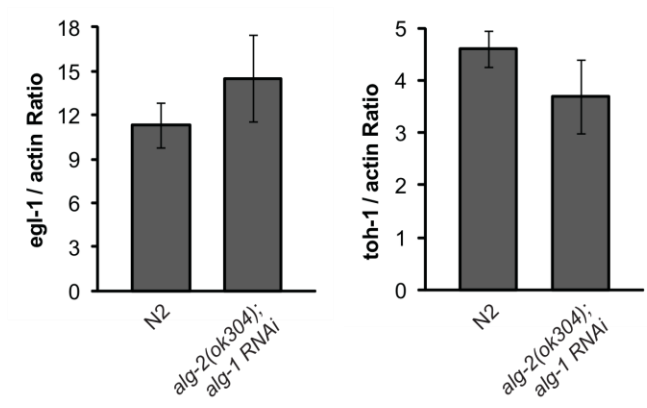

## Supplemental Materials and Methods

### Construction of reporters

To generate RL reporters containing miR-35 sites, annealed primers were inserted into XbaI-NotI sites of pCI neo RL p(A). miR-35 targets 3'UTR: 3'UTR sequences were amplified by PCR from genomic DNA or cDNA isolated from *C. elegans* embryos using primers listed in Table S1 and cloned into XbaI/NotI in pCI neo truncated RL, in which the RL cds region between NheI and BsaBI (position 1-764) was removed. For c34h3.1 3'UTR reporter, RL cDNA contained only region 491-936. The sequences of 6xmiR-35 mutant, 6xmiR-52, 6xmiR-52 mutant, *egl-1* 3'UTR (wild-type, miR-35 mutant, bantam mutant, miR-35 + bantam mutant), and *toh-1* 3'UTR (miR-35 mutant, bantam mutant, miR-35 and bantam mutant) were purchased from IDT, as pIDTSMART-KAN clones and were subcloned into pCI neo RL in XbaI-NotI sites.

### Embryonic extract Preparation

*C. elegans* embryonic pellets were homogenized in hypotonic buffer [10 mM HEPES-KOH pH 7.4, 15 mM KCl, 1.8 mM Mg(OAc)<sub>2</sub>, 2 mM DTT] with a pre-chilled Kontes dounce homogenizer. The extract was then centrifuged twice at 13,200 rpm for 10 minutes at 4°C. The supernatant was loaded onto a Column-Prep (BioRad) stacked with Sephadex G-25 Superfine beads (volume of beads was four-times the volume of the supernatant, Amersham Bioscience) and pushed into the matrix with 1 supernatant volume of isotonic buffer (30 mM HEPES-KOH pH 7.4, 100 mM KOAc, 1.8 mM Mg(OAc)<sub>2</sub>, 2 mM DTT). Multiple elutions (5-7) were gathered and protein concentrations



were determined by Bradford. The average concentration of active fractions ranged from 10-30 mg/mL.

### ***In vitro* Translation Assays**

Reactions were typically set up as follows: each 12.5 ul reaction contained 5 ul embryonic extract, 0.1 mM spermidine, 60 uM amino acids, 36 mM HEPES-KOH (pH 7.4), 2 mM Mg(OAc)<sub>2</sub>, 65 mM KOAc, 0.1 ug/ul calf liver tRNA, 0.096 U/ul RiboLock RNase Inhibitor (Fermentas), 16.8 mM creatine phosphate, 81.6 ng/ul creatine phosphokinase, 0.8 mM ATP, and 0.2 mM GTP). Reactions were incubated with mRNA (1 nM final) at 17°C for 0 to 3 hours, as indicated. Luciferase activities were analyzed with the Dual-Luciferase® Reporter Assay System (Promega). To assay for miRNA activity, reactions were pre-incubated with 50 nM (except where indicated) 2'-O-Me oligonucleotides (Dharmacon) prior to mRNA addition for 30 minutes at 17°C. The 2'-O-Me miRNA inhibitors were designed as antisense oligonucleotides to the mature miRNAs according to Wormbase registry ([www.wormbase.org](http://www.wormbase.org)).
